# Supplementary material
Source: PubMed Central journal article supplement (PMC7415516)
Supplement: NIHMS1580225-supplement-1.pdf [file NIHMS1580225-supplement-1.pdf]

## Supplemental Methods.

### *Noncompartmental Pharmacokinetic Analysis*

First dose PK parameters were calculated using noncompartmental methods (Phoenix WinNonlin 7.0, Certara Pharsight Corp, Cary, NC). Any plasma concentration measured below the LLOQ was excluded from analyses. The maximum plasma concentration ( $C_{MAX}$ ) and time to  $C_{MAX}$  ( $T_{MAX}$ ) were recorded as observed values. The area under the plasma concentration vs time curve to the last observed time point ( $AUC_{LAST}$ ) was calculated using the Linear Up Log Down trapezoidal rule. The elimination rate ( $k_{EL}$ ) was calculated as the slope of the log-transformed concentrations vs terminal time points. AUC extrapolated to time infinity ( $AUC_{INF}$ ) was calculated as  $AUC_{LAST} + C_{LAST}/k_{EL}$ , where  $C_{LAST}$  is the concentration at the last observed time point. Half-life ( $t_{1/2}$ ) was calculated as  $\ln 2/k_{EL}$ . Apparent oral clearance ( $CL/F$ ) was calculated as  $dose/AUC_{INF}$ ; apparent oral volume of distribution ( $Vz/F$ ) was calculated as  $CL/F$  divided by  $k_{EL}$ . PK parameters at steady-state (Cycle 2 Day 1) were calculated the same except AUC was calculated over the dosing interval  $\tau = 24$  hr ( $AUC_{TAU}$ ), clearance ( $CL_{SS}/F$ ) as  $dose/AUC_{TAU}$ , and  $Vz/F$  as  $CL_{SS}/F$  divided by  $k_{EL}$ . The number of subjects included in the pharmacokinetic analysis was insufficient for proper statistical testing.

**Supplemental Table 1. Adverse Events with an Attribution of at Least Possible Occurring in Greater than 15% of Patients Who Received Study Treatment (N=17) Sorted by Dosing Strategy**

| <b>Adverse Event</b>            | <b>450 mg Twice Daily<br/>N = 7</b> |                | <b>750 mg Once Daily<br/>N = 6</b> |                | <b>600 mg Once Daily<br/>N = 4</b> |                |
|---------------------------------|-------------------------------------|----------------|------------------------------------|----------------|------------------------------------|----------------|
|                                 | <b>Grade 1/2</b>                    | <b>Grade 3</b> | <b>Grade 1/2</b>                   | <b>Grade 3</b> | <b>Grade 1/2</b>                   | <b>Grade 3</b> |
| <i>Concentration Impairment</i> | 6 (86)                              | 0 (0)          | 5 (83)                             | 1 (17)         | 2 (50)                             | 0 (0)          |
| <i>Fatigue</i>                  | 5 (71)                              | 0 (0)          | 4 (67)                             | 0 (0)          | 2 (50)                             | 0 (0)          |
| <i>Tremor</i>                   | 3 (43)                              | 0 (0)          | 5 (83)                             | 0 (0)          | 2 (50)                             | 0 (0)          |
| <i>Nausea</i>                   | 4 (57)                              | 1 (14)         | 0 (0)                              | 0 (0)          | 3 (75)                             | 1 (25)         |
| <i>Dizziness</i>                | 2 (29)                              | 1 (14)         | 1 (17)                             | 1 (17)         | 1 (25)                             | 0 (0)          |
| <i>Blurred Vision</i>           | 1 (14)                              | 0 (0)          | 1 (17)                             | 0 (0)          | 2 (50)                             | 0 (0)          |
| <i>Hypotension</i>              | 3 (43)                              | 0 (0)          | 0 (0)                              | 0 (0)          | 0 (0)                              | 1 (25)         |
| <i>Vomiting</i>                 | 1 (14)                              | 0 (0)          | 0 (0)                              | 0 (0)          | 2 (50)                             | 0 (0)          |
| <i>Edema (limbs)</i>            | 1 (14)                              | 0 (0)          | 1 (17)                             | 0 (0)          | 1 (25)                             | 0 (0)          |
| <i>Fall</i>                     | 1 (14)                              | 1 (14)         | 0 (0)                              | 0 (0)          | 1 (25)                             | 0 (0)          |
| <i>Gait Disturbance</i>         | 3 (43)                              | 0 (0)          | 0 (0)                              | 0 (0)          | 0 (0)                              | 0 (0)          |
| <i>Malaise</i>                  | 1 (14)                              | 0 (0)          | 2 (33)                             | 0 (0)          | 0 (0)                              | 0 (0)          |
| <i>Presyncope</i>               | 3 (43)                              | 0 (0)          | 0 (0)                              | 0 (0)          | 0 (0)                              | 0 (0)          |
